# Supplementary material for: Polyethyleneimine-coated MXene quantum dots improve cotton tolerance to Verticillium dahliae by maintaining ROS homeostasis
Source: PubMed Central journal article supplement (PMC10651998; doi:10.1038/s41467-023-43192-4), 2023-11-15
Supplement: 41467_2023_43192_MOESM2_ESM.pdf [file 41467_2023_43192_MOESM2_ESM.pdf]

File Name: Supplementary Data 1

Description: GO enrichment analysis of up-regulated DEGs at stage I in V991 transcriptome.

File Name: Supplementary Data 2

Description: GO enrichment analysis of up-regulated DEGs at stage II in V991 transcriptome.

File Name: Supplementary Data 3

Description: GO enrichment analysis of up-regulated DEGs at stage I in cotton (V991) transcriptome.

File Name: Supplementary Data 4

Description: GO enrichment analysis of up-regulated DEGs at stage II in cotton (V991) transcriptome.

File Name: Supplementary Data 5

Description: Primers used in the study.
